# Supplementary material for: Anti-Obesity and Anti-Hyperglycemic Effects of Meretrix lusoria Protamex Hydrolysate in ob/ob Mice
Source: MDPI journal article supplement (doi:10.3390/ijms23074015), 2022-04-05
Supplement: s1 [file s1]

## Anti-obesity and Anti-hyperglycemic Effects of *Meretrix lusoria* Protamex Hydrolysate in *ob/ob* mice

Min Ju Kim <sup>1,†</sup>, Ramakrishna Chilakala <sup>1,†</sup>, Hee Geun Jo <sup>1</sup>, Seung-Jae Lee <sup>2</sup>, Dong-Sung Lee <sup>3</sup>, Sun Hee Cheong <sup>1,\*</sup>

<sup>1</sup> Department of Marine Bio-Food Sciences, College of Fisheries and Ocean Sciences, Chonnam National University, Yeosu 59626, Korea.

modori96k@naver.com (M.J.K.); ramach2006@gmail.com (R.C.); altkwh@naver.com (H.G.J.)

<sup>2</sup> Immunoregulatory Material Research Center, Korea Research Institute of Bioscience and Biotechnology (KRIBB), Jeongeup 56212, Korea; seung99@kribb.re.kr

<sup>3</sup> Department of Pharmacy, College of Pharmacy, Chosun University, Dong-gu, Gwangju, 61452, Korea  
dslee2771@chosun.ac.kr

\* Correspondence: sunny3843@jnu.ac.kr; Tel.: (Phone: +82-61-659-7215; Fax: +82-61-659-7219)

† These authors contributed equally to this study.

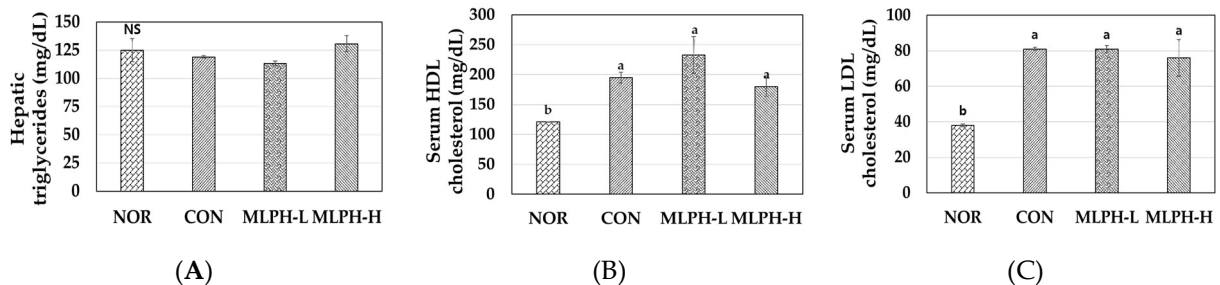

**Figure S1.** Effect of MLPH fraction on (A) hepatic triglycerides; (B) serum HDL cholesterol, and (C) serum LDL cholesterol. Each value represents the mean  $\pm$  SEM ( $n=6$ ). <sup>a-b</sup> Values not sharing a common letter are significantly different at  $p < 0.05$  by Tukey's multiple comparison test, <sup>NS</sup> : not significant.

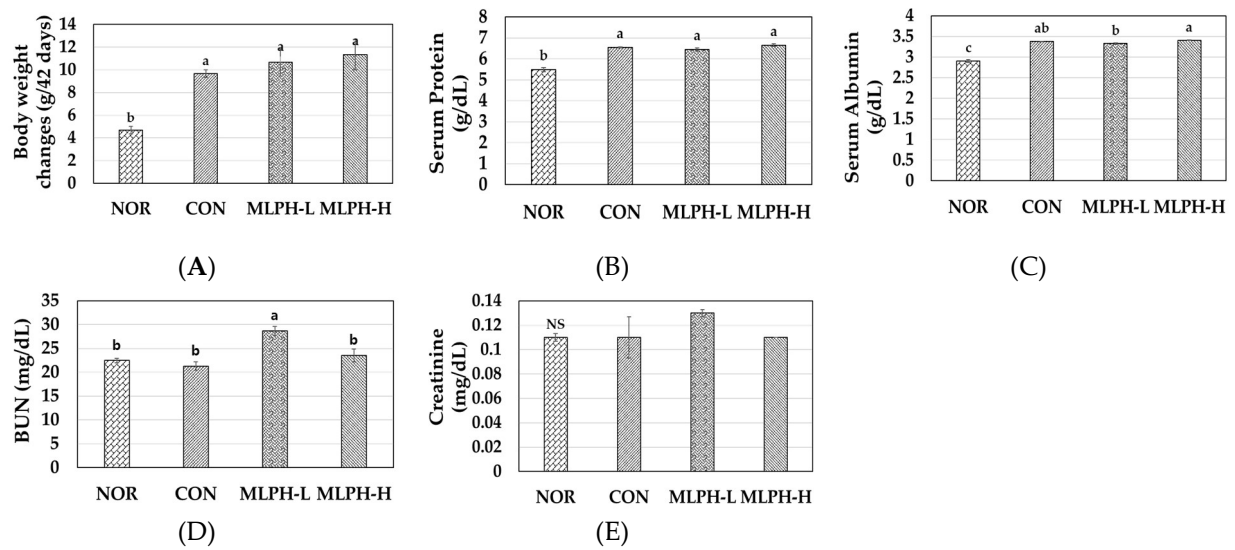

**Figure S2.** Effects of MLPH fraction on (A) mouse body weight changes during 6 weeks of treatment; metabolic parameters: (B) serum protein, (C) serum albumin, (D) blood urea nitrogen (BUN), and (E) creatinine. Each value represents the mean  $\pm$  SEM (n=6). <sup>a-c</sup> Values not sharing a common letter are significantly different at  $p < 0.05$  by Tukey's multiple comparison test, <sup>NS</sup> : not significant.
